# Supplementary material for: Controlled 2H/1T phase transition in MoS2 monolayers by a strong interface with M2C MXenes: a computational study
Source: Royal Society of Chemistry journal article supplement (doi:10.1039/d1cp02648h), 2021-01-01
Supplement: d1cp02648h1.pdf [file d1cp02648h1.pdf]

## Electronic Supporting Information

### **Controlled 2H/1T Phase Transition in MoS<sub>2</sub> Monolayer by Strong Interface with M<sub>2</sub>C MXene: A Computational Study**

Zhongxu Wang,<sup>a</sup> Yu Liu,<sup>b</sup> FengYu Li,<sup>b,\*</sup> Jingxiang Zhao<sup>a,\*</sup>

<sup>a</sup> Key Laboratory for Photonic and Electronic Bandgap Materials, Ministry of Education, School of Physics and Electronic Engineering, Harbin Normal University Harbin, 150025, China

<sup>b</sup> School of Physical Science and Technology, Inner Mongolia University, Hohhot, 010021, China

\* To whom correspondence should be addressed. Email: fengyuli@imu.edu.cn and xjz\_hmily@163.com.

**Table S1.** The computed lattice parameters (Å) and bond lengths (Å) of various M<sub>2</sub>C-typed MXenes, 1T-MoS<sub>2</sub>, and 2H-MoS<sub>2</sub> monolayers.

|                     | lattice parameters | bond length |
|---------------------|--------------------|-------------|
| Ti <sub>2</sub> C   | 3.04               | 2.10        |
| V <sub>2</sub> C    | 2.88               | 1.99        |
| Cr <sub>2</sub> C   | 2.80               | 1.93        |
| Zr <sub>2</sub> C   | 3.27               | 2.27        |
| Nb <sub>2</sub> C   | 3.11               | 2.16        |
| Mo <sub>2</sub> C   | 2.98               | 2.09        |
| Hf <sub>2</sub> C   | 3.20               | 2.24        |
| Ta <sub>2</sub> C   | 3.07               | 2.15        |
| W <sub>2</sub> C    | 2.96               | 2.09        |
| 1T-MoS <sub>2</sub> | 3.13               | 2.43        |
| 2H-MoS <sub>2</sub> | 3.17               | 2.40        |

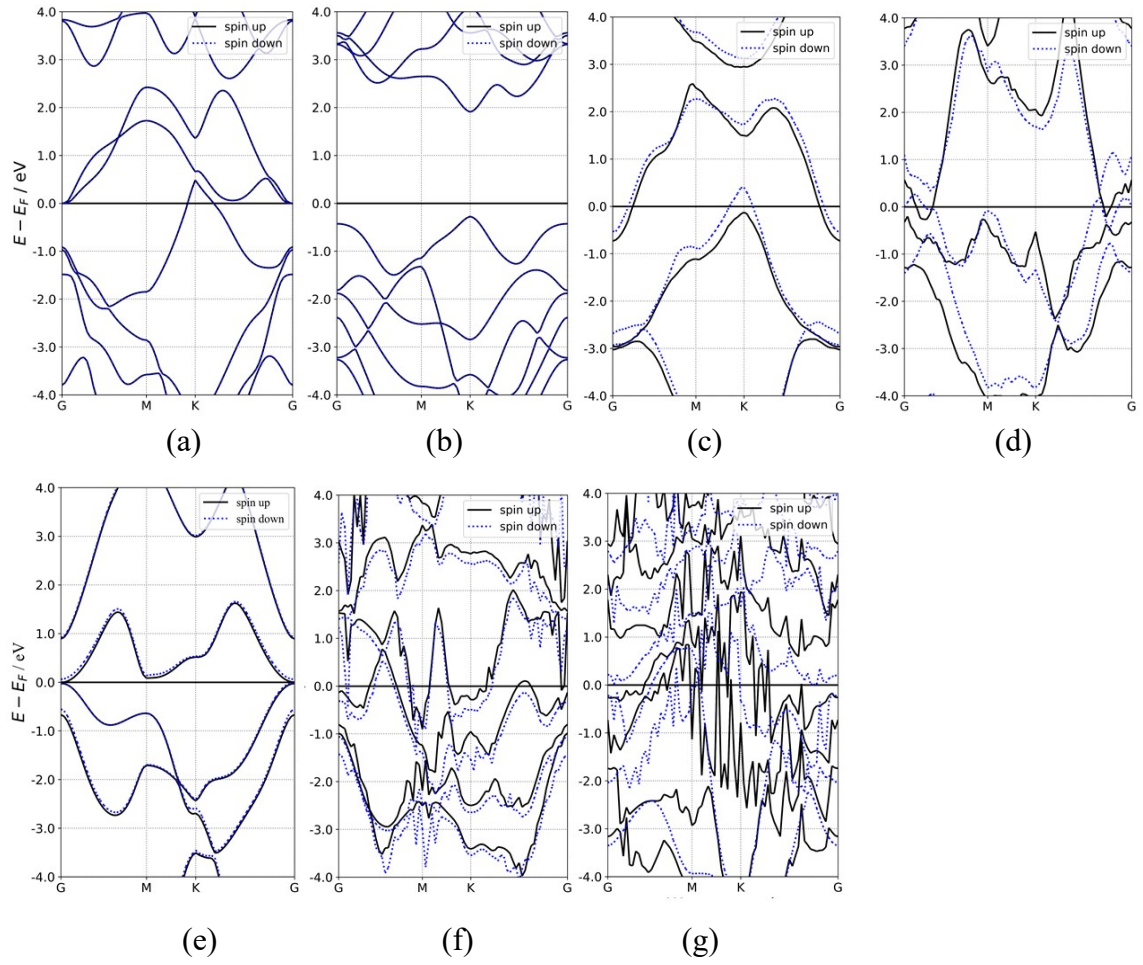

**Fig. S1.** The computed band structures of pristine (a) 1T-MoS<sub>2</sub>, (b) 2H-MoS<sub>2</sub>, (c) Ti<sub>2</sub>C, (d) Zr<sub>2</sub>C, (e) Hf<sub>2</sub>C, (f) Nb<sub>2</sub>C, and (g) Ta<sub>2</sub>C nanosheets. The Fermi level was set to zero.

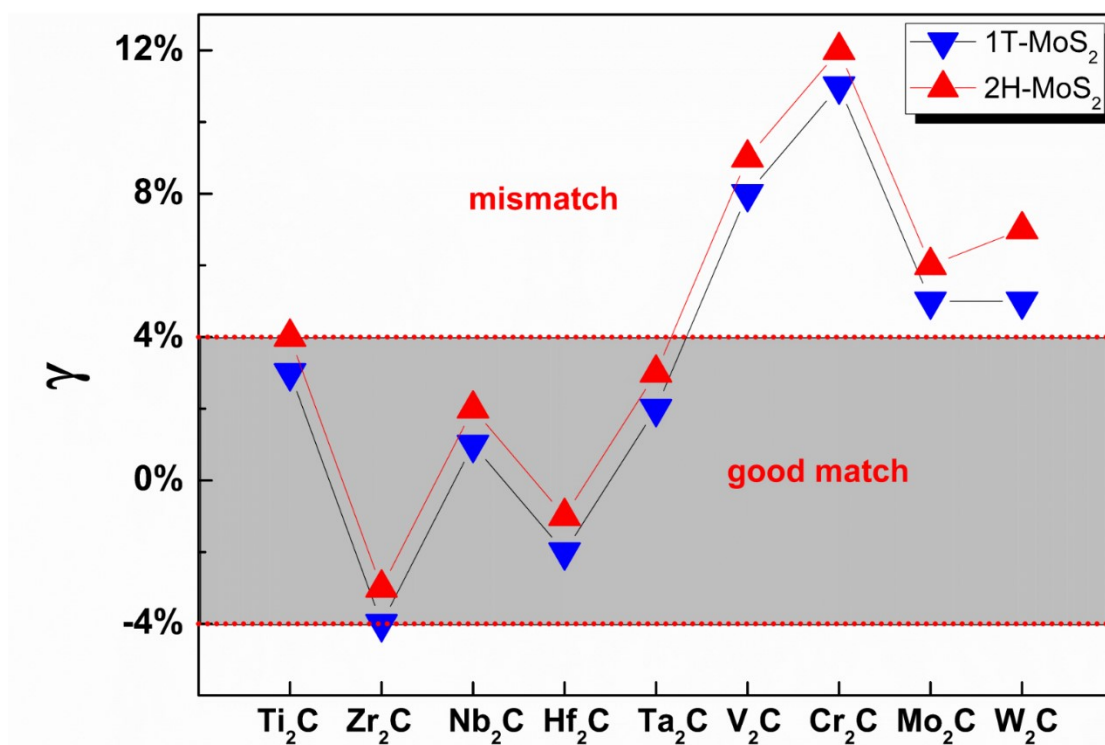

**Fig. S2.** The computed lattice mismatch ( $\gamma$ ) between 1T- or 2H-MoS<sub>2</sub> monolayers and M<sub>2</sub>C-type MXene nanosheets.

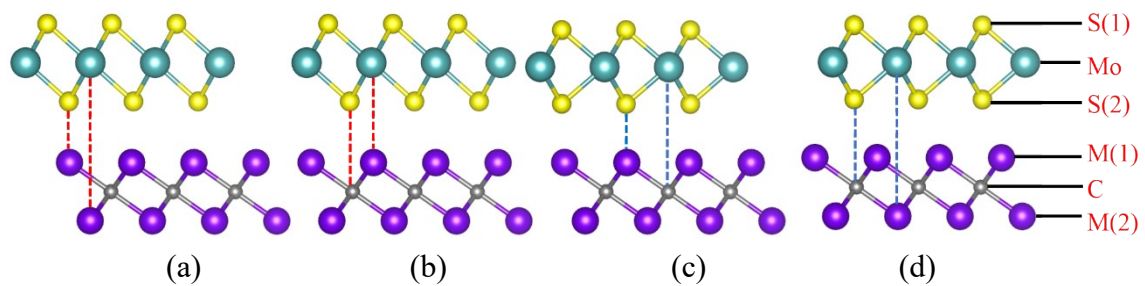

**Fig. S3.** The considered initial configurations for (a) and (b) 1T-MoS<sub>2</sub>, (c) and (d) 2H-

MoS<sub>2</sub> monolayer on M<sub>2</sub>C-MXenes.

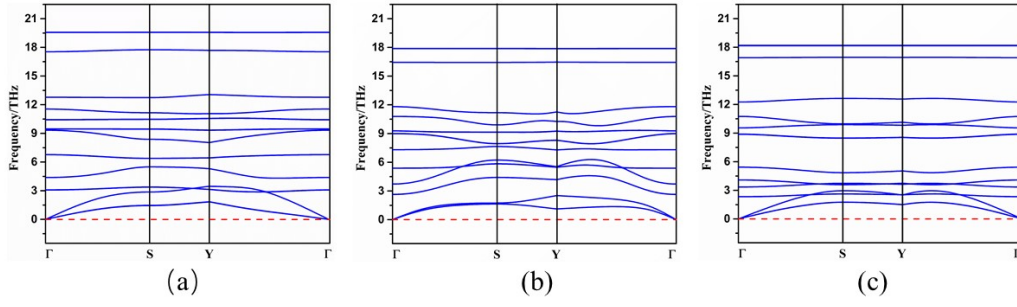

**Fig. S4.** The computed phonon dispersions of 1T-MoS<sub>2</sub>/M<sub>2</sub>C heterostructures, where M represents (a) Ti, (b) Zr and (c) Hf, respectively.

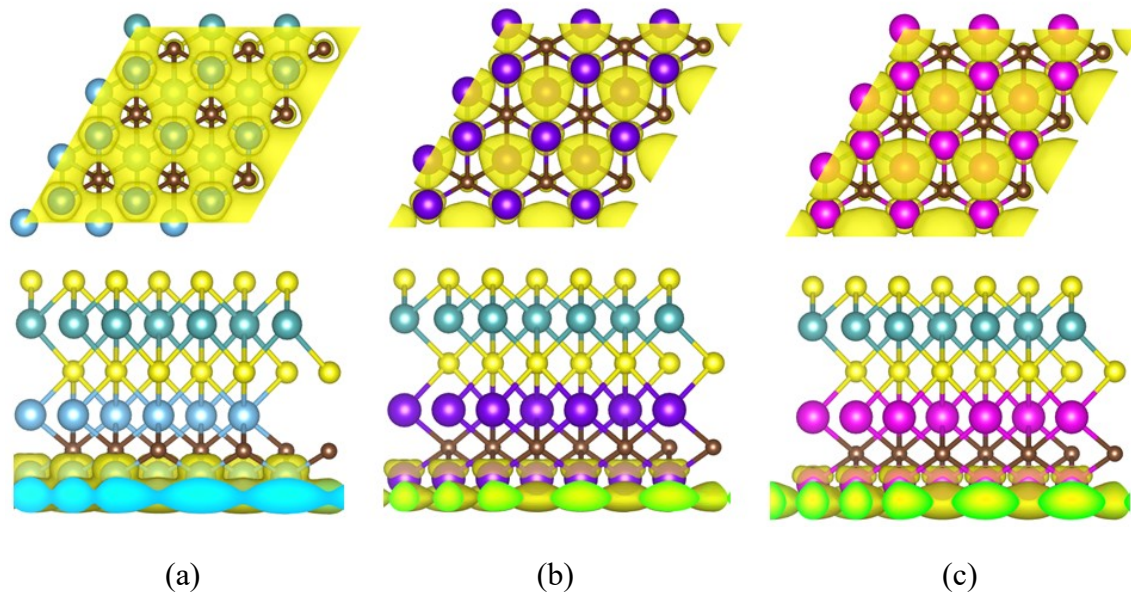

**Fig. S5.** The iso-surface of the spin-resolved density pictures of (a) 1T-MoS<sub>2</sub>/Ti<sub>2</sub>C, (b) 1T-MoS<sub>2</sub>/Zr<sub>2</sub>C, and (c) 1T-MoS<sub>2</sub>/Hf<sub>2</sub>C heterostructures. The iso-value is set to be 0.005 eÅ<sup>-2</sup>.

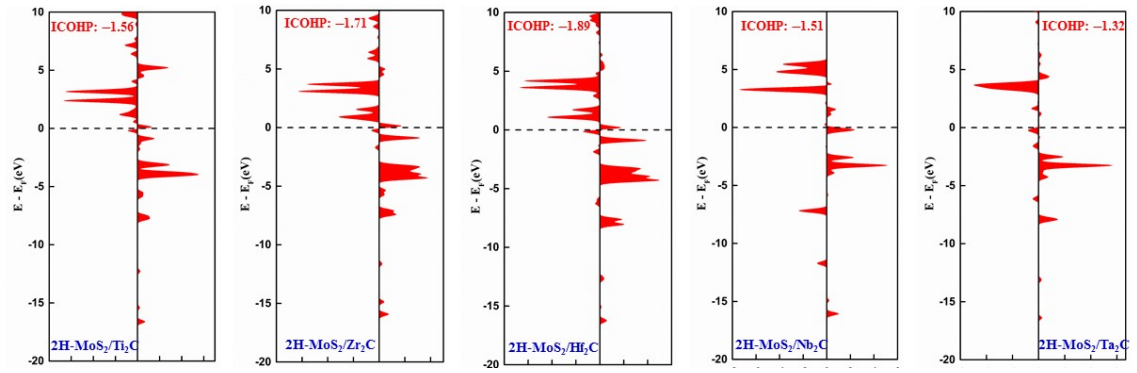

**Fig. S6.** The crystal orbital Hamilton population (COHP) between the S and metal atoms in 2H-MoS<sub>2</sub>/M<sub>2</sub>C heterostructures.



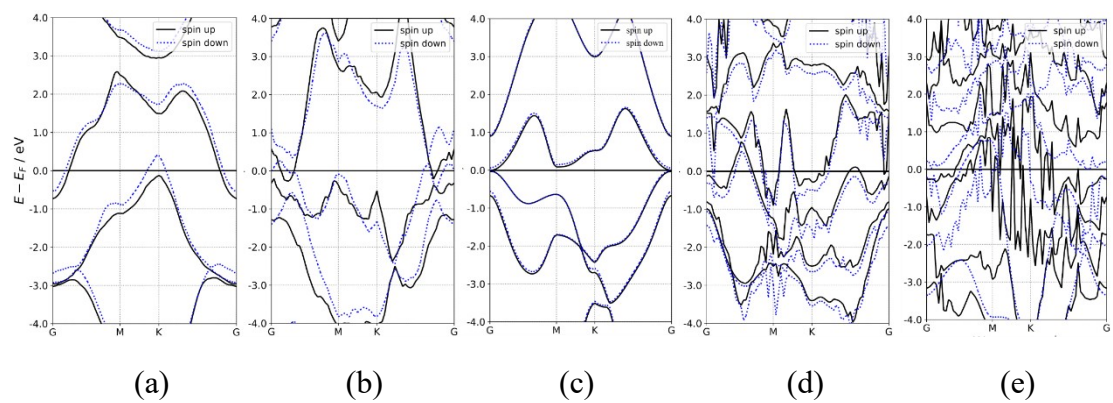

**Fig. S7.** The computed band structures of 2H-MoS<sub>2</sub>/M<sub>2</sub>C heterostructures, where M represents (a) Ti, (b) Zr, (c) Hf, (d) Nb, and (e) Ta, respectively. The Fermi level was set to zero.
